# Supplementary material for: Four monomeric copper(ii) complexes of non-steroidal anti-inflammatory drug Ibuprofen and N-donor ligands: syntheses, characterization, crystal structures and cytotoxicity studies
Source: Royal Society of Chemistry journal article supplement (doi:10.1039/c7nj00247e), 2017-01-01

## Supplementary Information

### **Four monomeric copper(II) complexes of non-steroidal anti-inflammatory drug Ibuprofen and N-donor ligands: Syntheses, characterization, crystal structures and cytotoxicity studies.**

Santosh Kumar, Shipra Garg, Raj Pal Sharma, Paloth Venugopalan, Lorenzo Tenti, Valeria Ferretti, Laetitia Nivellet, Michel Tarpin, Emmanuel Guillon

#### **Table of Contents**

**Table S1.** Hydrogen bonding parameters (Å, °) for complexes **1-4**

**Figure S1.** FT-IR spectra of complexes **1-4**

**Figure S2.** UV-Visible spectra of complexes **1-4** in DMSO and methanol solvent.

**Figure S3.** Diffuse Reflectance spectra of complexes **1-4**

**Figure S4:** UV-Visible spectra of complexes **1-4** using DMSO and DMSO-H<sub>2</sub>O (2:1) as solvent.

**Figure S5.** Combined TGA-DTA plots for complexes **1-4**

Checkcif report of complex **1**

Checkcif report of complex **2**

Checkcif report of complex **3**

Checkcif report of complex **4**

**Table S1.** Hydrogen bonding parameters (Å, °) for complexes **1-4**

|                         | D-H     | D...A    | H...A   | D-H...A |
|-------------------------|---------|----------|---------|---------|
| <b>Complex 1</b>        |         |          |         |         |
| O1W-H...O4              | 0.85(4) | 2.608(4) | 1.78(4) | 168(3)  |
| O1W-H...O1 <sup>i</sup> | 0.87(3) | 2.768(3) | 1.91(3) | 164(3)  |
| C11-H...O1 <sup>i</sup> | 0.93    | 3.594(3) | 2.67    | 170     |

Symmetry code: (i) 1-x,-y,-z

|                           |         |          |         |        |
|---------------------------|---------|----------|---------|--------|
| <b>Complex 2</b>          |         |          |         |        |
| O1W-H...O2                | 0.87(3) | 2.648(3) | 1.83(4) | 155(3) |
| C1-H...O2W                | 0.93    | 3.295(4) | 2.44    | 152    |
| O1W-H...O3 <sup>i</sup>   | 0.84(2) | 2.807(2) | 1.98(2) | 170(2) |
| C5-H...O3 <sup>i</sup>    | 0.93    | 3.485(3) | 2.56    | 170    |
| C10-H...O2W <sup>ii</sup> | 0.93    | 3.386(4) | 2.53    | 153    |

*Short contacts:*

|                         |          |
|-------------------------|----------|
| O4 ...O2W               | 2.703(5) |
| O2W...O1 <sup>iii</sup> | 3.014(3) |

Symmetry codes: (i) 1-x,-y,-z; (ii) x+1,y,z; (iii) 1-x,1-y,-z

|                          |         |          |         |        |
|--------------------------|---------|----------|---------|--------|
| <b>Complex 3</b>         |         |          |         |        |
| O1W-H...O2               | 0.87(3) | 2.967(5) | 2.10(4) | 174(3) |
| N1-H...O1W <sup>i</sup>  | 0.86(3) | 3.102(5) | 2.27(3) | 162(3) |
| O1W-H...O2 <sup>ii</sup> | 0.85(3) | 3.030(5) | 2.19(4) | 168(3) |
| C1-H...O1 <sup>iii</sup> | 0.97    | 3.442(4) | 2.61    | 143    |

Symmetry codes: (i) x,y+1,z; (ii) -x,y-1/2,1/2-z; (iii) -x,1-y,-z

|                         |         |          |         |        |
|-------------------------|---------|----------|---------|--------|
| <b>Complex 4</b>        |         |          |         |        |
| C3-H...O2               | 0.96    | 3.417(7) | 2.64    | 138    |
| O1W-H...O2 <sup>i</sup> | 0.83(6) | 2.714(4) | 1.91(6) | 163(6) |
| N1-H...O3 <sup>i</sup>  | 0.86(4) | 2.768(6) | 1.94(4) | 163(4) |
| N1-H...O2 <sup>ii</sup> | 0.91(6) | 2.886(6) | 2.07(6) | 148(6) |

Symmetry codes: (i) 1-x,y+1,1/2-z; (ii) 1-x,y,1/2-z

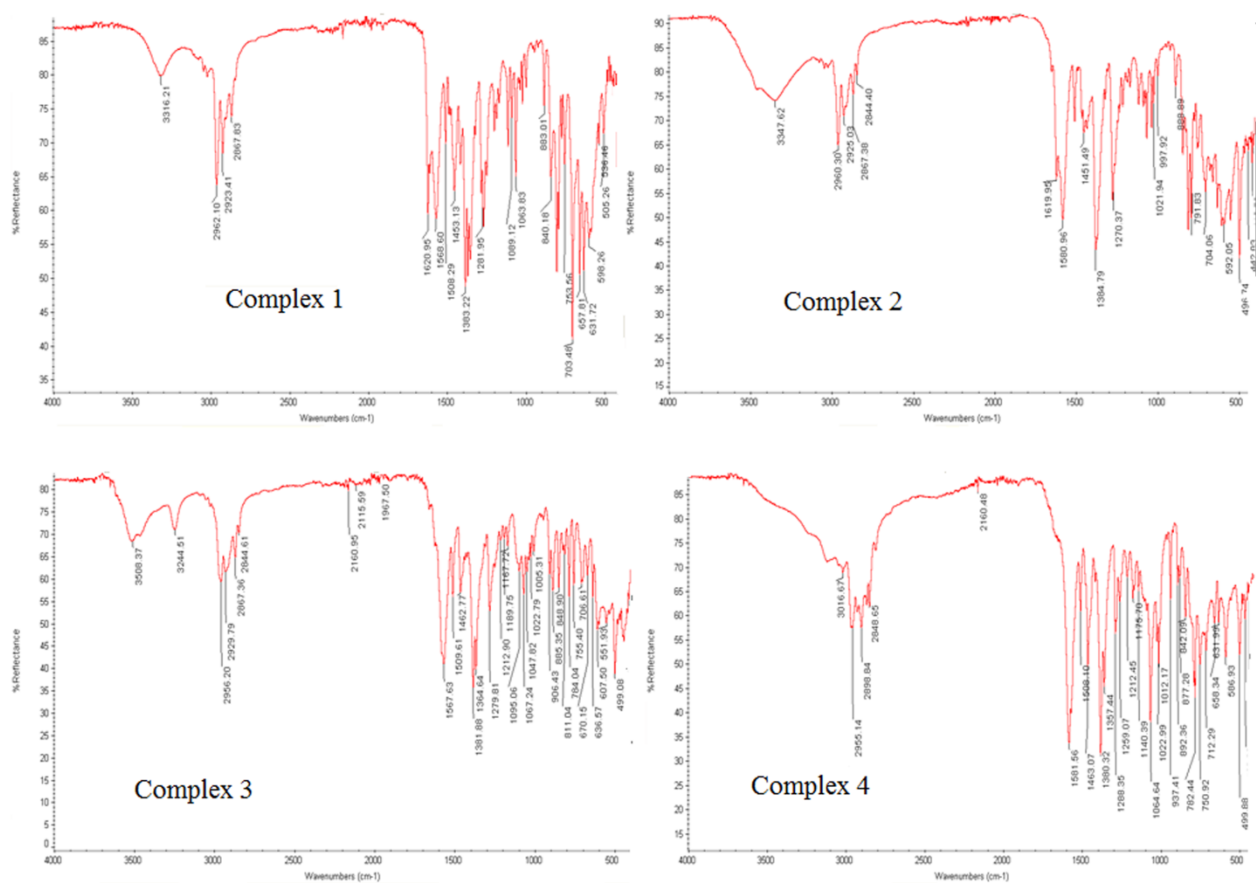

**Figure S1.** FT-IR spectra of complexes 1-4

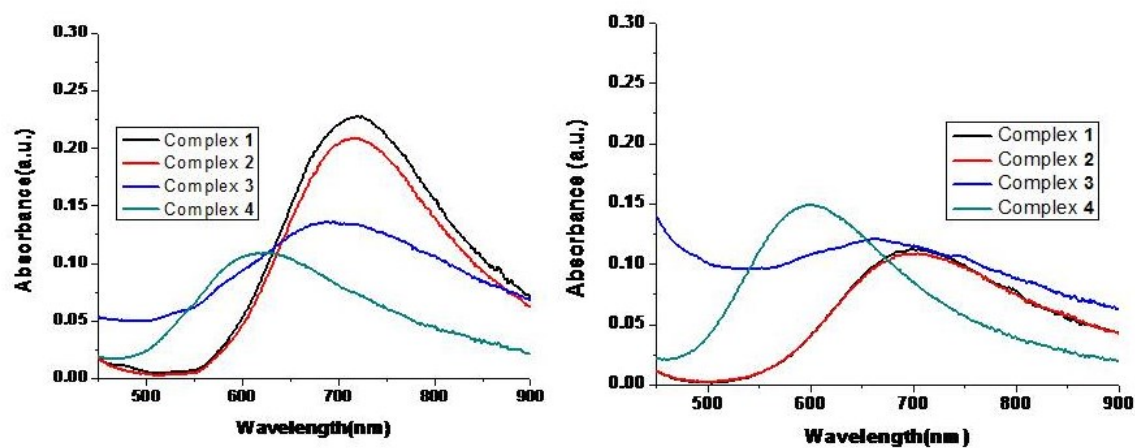

Figure S2. UV-Visible spectra of complexes 1-4 in DMSO and methanol solvent.

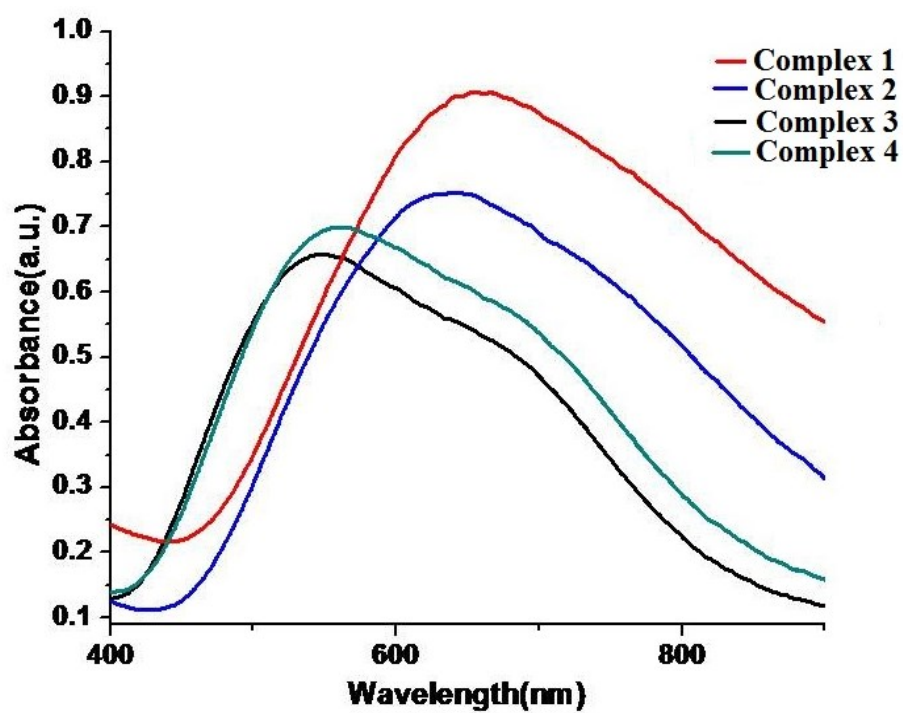

Figure S3. Diffuse Reflectance spectra of complexes 1-4

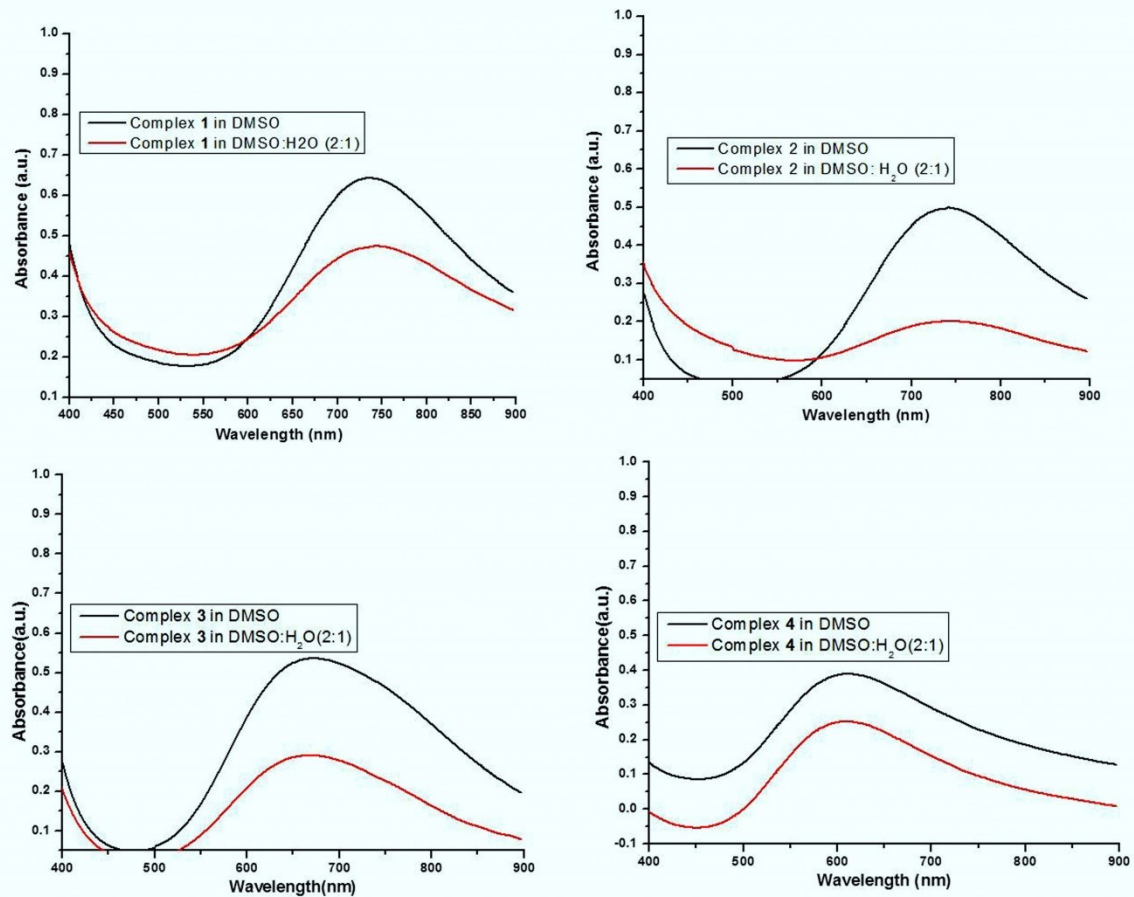

**Fig. S4:** UV-Visble spectra of complexes 1-4 using DMSO and DMSO-H<sub>2</sub>O (2:1) as solvent.

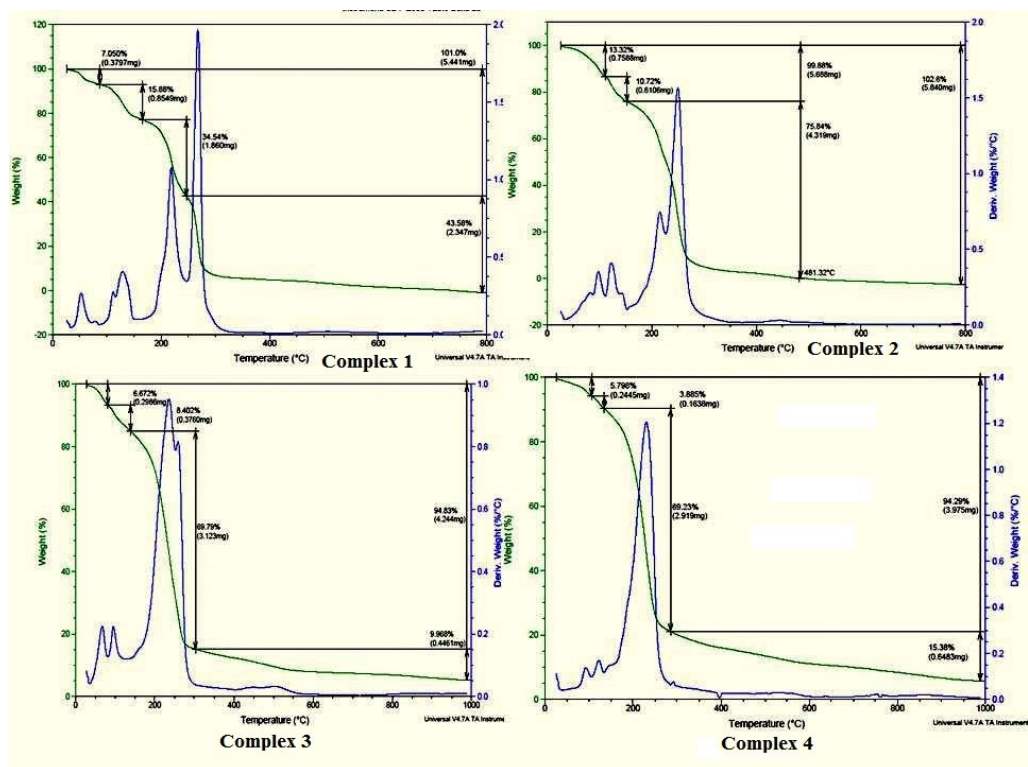

**Fig. S5.** Combined TGA-DTA plots for complexes 1-4

# Datablock: betapic

---

Bond precision: C-C = 0.0063 Å Wavelength=0.71073  
Cell: a=9.4147(2) b=11.8811(3) c=17.5005(4)  
alpha=95.564(1) beta=103.187(1) gamma=103.464(1)  
Temperature: 295 K

|                        | Calculated       | Reported         |
|------------------------|------------------|------------------|
| Volume                 | 1830.12(7)       | 1830.12(7)       |
| Space group            | P -1             | P -1             |
| Hall group             | -P 1             | -P 1             |
| Moiety formula         | C38 H50 Cu N2 O5 | C38 H50 Cu N2 O5 |
| Sum formula            | C38 H50 Cu N2 O5 | C38 H50 Cu N2 O5 |
| Mr                     | 678.35           | 678.34           |
| Dx, g cm <sup>-3</sup> | 1.231            | 1.231            |
| Z                      | 2                | 2                |
| Mu (mm <sup>-1</sup> ) | 0.639            | 0.639            |
| F000                   | 722.0            | 722.0            |
| F000'                  | 722.90           |                  |
| h, k, lmax             | 12, 15, 23       | 12, 15, 23       |
| Nref                   | 8845             | 8751             |
| Tmin, Tmax             | 0.765, 0.897     | 0.782, 0.896     |
| Tmin'                  | 0.741            |                  |

Correction method= # Reported T Limits: Tmin=0.782  
Tmax=0.896 AbsCorr = MULTI-SCAN  
Data completeness= 0.989 Theta(max)= 27.998  
R(reflections)= 0.0560( 7084) wR2(reflections)= 0.1690( 8751)  
S = 1.079 Npar= 423

---

The following ALERTS were generated. Each ALERT has the format

**test-name\_ALERT\_alert-type\_alert-level.**

Click on the hyperlinks for more details of the test.

---

## 🟡 Alert level B

PLAT413\_ALERT\_2\_B Short Inter XH3 .. XHn H24B .. H38C .. 1.96 Ang.

---

## 🟢 Alert level C

PLAT019\_ALERT\_1\_C \_diffn\_measured\_fraction\_theta\_full/\*\_max < 1.0 0.998 Report  
PLAT220\_ALERT\_2\_C Non-Solvent Resd 1 C Ueq(max)/Ueq(min) Range 5.3 Ratio  
PLAT222\_ALERT\_3\_C Non-Solvent Resd 1 H Uiso(max)/Uiso(min) Range 6.7 Ratio  
PLAT230\_ALERT\_2\_C Hirshfeld Test Diff for C23 -- C25 .. 6.9 s.u.  
PLAT230\_ALERT\_2\_C Hirshfeld Test Diff for C36 -- C37 .. 6.1 s.u.  
PLAT241\_ALERT\_2\_C High 'MainMol' Ueq as Compared to Neighbors of O2 Check  
PLAT242\_ALERT\_2\_C Low 'MainMol' Ueq as Compared to Neighbors of C22 Check

### And 2 other PLAT242 Alerts

More ...

PLAT314\_ALERT\_2\_C Check Small Angle for H2O: Metal-O1W -H1W 78.11 Degree  
PLAT341\_ALERT\_3\_C Low Bond Precision on C-C Bonds ..... 0.00628 Ang.  
PLAT360\_ALERT\_2\_C Short C(sp3)-C(sp3) Bond C36 - C37 .. 1.41 Ang.  
PLAT412\_ALERT\_2\_C Short Intra XH3 .. XHn H24A .. H25A .. 1.83 Ang.

---

## 🟠 Alert level G

PLAT002\_ALERT\_2\_G Number of Distance or Angle Restraints on AtSite 6 Note  
PLAT003\_ALERT\_2\_G Number of Uiso or Uij Restrained non-H Atoms ... 4 Report

|                   |                                                  |       |        |
|-------------------|--------------------------------------------------|-------|--------|
| PLAT072_ALERT_2_G | SHELXL First Parameter in WGHT Unusually Large   | 0.11  | Report |
| PLAT154_ALERT_1_G | The s.u.'s on the Cell Angles are Equal ..(Note) | 0.001 | Degree |
| PLAT172_ALERT_4_G | The CIF-Embedded .res File Contains DFIX Records | 4     | Report |
| PLAT186_ALERT_4_G | The CIF-Embedded .res File Contains ISOR Records | 1     | Report |
| PLAT793_ALERT_4_G | The Model has Chirality at C14 (Centro SPGR)     | S     | Verify |
| PLAT793_ALERT_4_G | The Model has Chirality at C27 (Centro SPGR)     | R     | Verify |
| PLAT794_ALERT_5_G | Tentative Bond Valency for Cu1 (II) .....        | 2.07  | Note   |
| PLAT860_ALERT_3_G | Number of Least-Squares Restraints .....         | 28    | Note   |
| PLAT933_ALERT_2_G | Number of OMIT Records in Embedded .res File ... | 4     | Note   |

---

0 **ALERT level A** = Most likely a serious problem - resolve or explain

1 **ALERT level B** = A potentially serious problem, consider carefully

13 **ALERT level C** = Check. Ensure it is not caused by an omission or oversight

11 **ALERT level G** = General information/check it is not something unexpected

2 ALERT type 1 CIF construction/syntax error, inconsistent or missing data

15 ALERT type 2 Indicator that the structure model may be wrong or deficient

3 ALERT type 3 Indicator that the structure quality may be low

4 ALERT type 4 Improvement, methodology, query or suggestion

1 ALERT type 5 Informative message, check

---

It is advisable to attempt to resolve as many as possible of the alerts in all categories. Often the minor alerts point to easily fixed oversights, errors and omissions in your CIF or refinement strategy, so attention to these fine details can be worthwhile. In order to resolve some of the more serious problems it may be necessary to carry out additional measurements or structure refinements. However, the purpose of your study may justify the reported deviations and the more serious of these should normally be commented upon in the discussion or experimental section of a paper or in the "special\_details" fields of the CIF. checkCIF was carefully designed to identify outliers and unusual parameters, but every test has its limitations and alerts that are not important in a particular case may appear. Conversely, the absence of alerts does not guarantee there are no aspects of the results needing attention. It is up to the individual to critically assess their own results and, if necessary, seek expert advice.

### Publication of your CIF in IUCr journals

A basic structural check has been run on your CIF. These basic checks will be run on all CIFs submitted for publication in IUCr journals (*Acta Crystallographica*, *Journal of Applied Crystallography*, *Journal of Synchrotron Radiation*); however, if you intend to submit to *Acta Crystallographica Section C* or *E* or *IUCrData*, you should make sure that full publication checks are run on the final version of your CIF prior to submission.

### Publication of your CIF in other journals

Please refer to the *Notes for Authors* of the relevant journal for any special instructions relating to CIF submission.



PLATON version of 11/08/2016; check.def file version of 04/08/2016

## Datablock betapic - ellipsoid plot

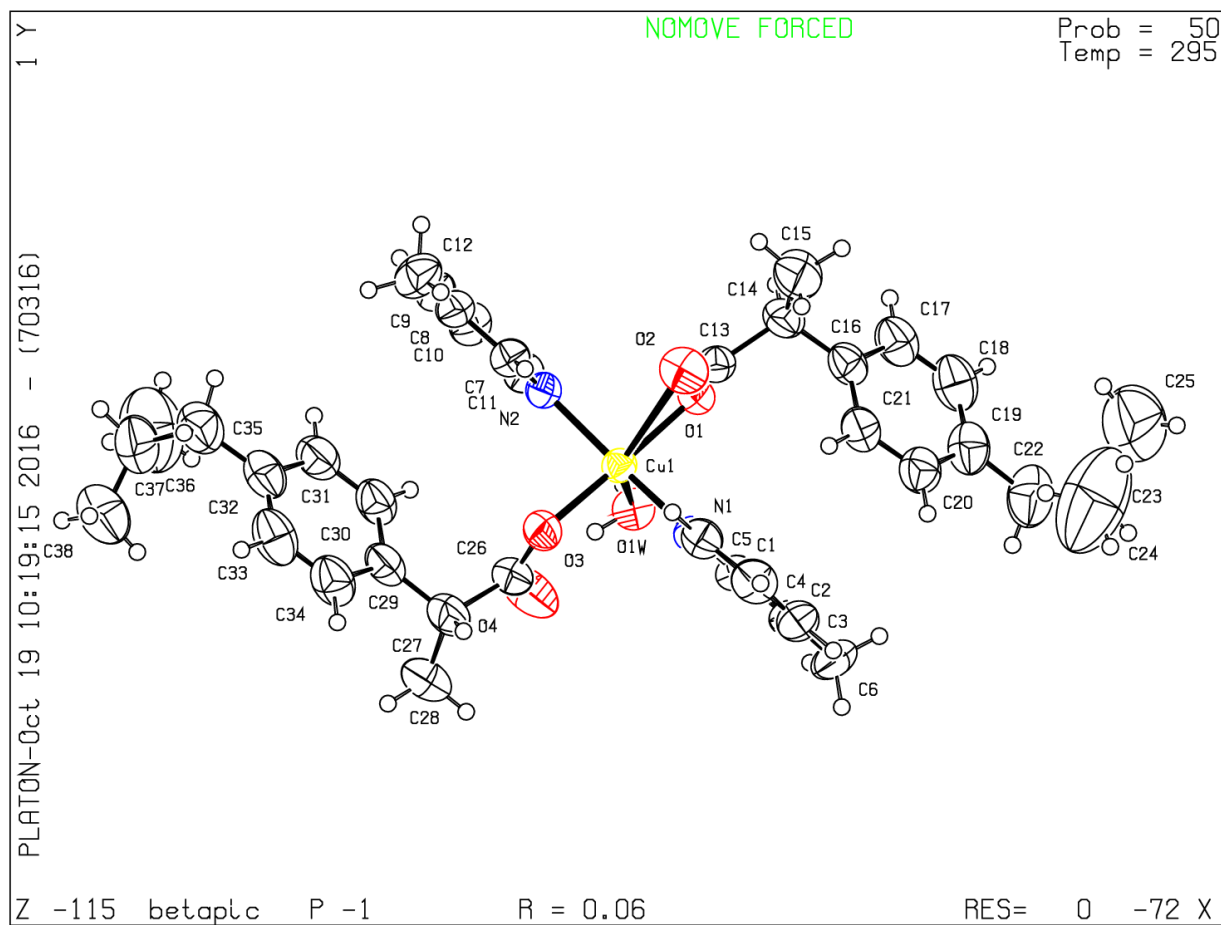

## Complex 2- checkcif

### Datablock: Cuibufgamapic

---

|                 |                                                        |                    |
|-----------------|--------------------------------------------------------|--------------------|
| Bond precision: | C-C = 0.0047 Å                                         | Wavelength=0.71073 |
| Cell:           | a=10.2706(2)      b=11.8221(3)      c=17.2366(3)       |                    |
|                 | alpha=104.3850(14) beta=95.6170(14) gamma=109.5680(13) |                    |
| Temperature:    | 295 K                                                  |                    |

  

|                        | Calculated          | Reported               |
|------------------------|---------------------|------------------------|
| Volume                 | 1872.20(7)          | 1872.19(7)             |
| Space group            | P -1                | P -1                   |
| Hall group             | -P 1                | -P 1                   |
| Moiety formula         | C38 H50 Cu N2 O5, O | C38 H50 Cu N2 O5, H2 O |
| Sum formula            | C38 H50 Cu N2 O6    | C38 H52 Cu N2 O6       |
| Mr                     | 694.35              | 696.35                 |
| Dx, g cm <sup>-3</sup> | 1.232               | 1.235                  |
| Z                      | 2                   | 2                      |
| Mu (mm <sup>-1</sup> ) | 0.628               | 0.629                  |
| F000                   | 738.0               | 742.0                  |
| F000'                  | 738.92              |                        |
| h, k, lmax             | 13, 15, 22          | 13, 15, 22             |
| Nref                   | 9057                | 8977                   |
| Tmin, Tmax             | 0.773, 0.865        | 0.646, 0.892           |
| Tmin'                  | 0.773               |                        |

Correction method= # Reported T Limits: Tmin=0.646  
Tmax=0.892 AbsCorr = MULTI-SCAN

Data completeness= 0.991      Theta(max)= 27.998

R(reflections)= 0.0490( 7084)      wR2(reflections)= 0.1452( 8977)

S = 1.042      Npar= 432

---

The following ALERTS were generated. Each ALERT has the format

**test-name\_ALERT\_alert-type\_alert-level.**

Click on the hyperlinks for more details of the test.

---

#### Alert level B

PLAT306\_ALERT\_2\_B Isolated Oxygen Atom (H-atoms Missing ?) ..... O2W Check  
PLAT430\_ALERT\_2\_B Short Inter D...A Contact O2W .. O4 .. 2.70 Ang.

---

#### Alert level C

PLAT041\_ALERT\_1\_C Calc. and Reported SumFormula Strings Differ Please Check  
PLAT043\_ALERT\_1\_C Calculated and Reported Mol. Weight Differ by .. 2.00 Check  
PLAT068\_ALERT\_1\_C Reported F000 Differs from Calcd (or Missing)... Please Check  
PLAT220\_ALERT\_2\_C Non-Solvent Resd 1 C Ueq(max)/Ueq(min) Range 5.0 Ratio  
PLAT222\_ALERT\_3\_C Non-Solvent Resd 1 H Uiso(max)/Uiso(min) Range 5.7 Ratio  
PLAT241\_ALERT\_2\_C High 'MainMol' Ueq as Compared to Neighbors of O4 Check  
PLAT242\_ALERT\_2\_C Low 'MainMol' Ueq as Compared to Neighbors of C23 Check  
PLAT242\_ALERT\_2\_C Low 'MainMol' Ueq as Compared to Neighbors of C36 Check  
PLAT314\_ALERT\_2\_C Check Small Angle for H2O: Metal-O1W -H2W 94.81 Degree  
PLAT413\_ALERT\_2\_C Short Inter XH3 .. XHn H24A .. H24A .. 2.09 Ang.

---

#### Alert level G

FORMU01\_ALERT\_2\_G There is a discrepancy between the atom counts in the  
\_chemical\_formula\_sum and the formula from the \_atom\_site\* data.

Atom count from \_chemical\_formula\_sum: C38 H52 Cu1 N2 O6  
 Atom count from the \_atom\_site data: C38 H50 Cu1 N2 O6  
 CELLZ01\_ALERT\_1\_G Difference between formula and atom\_site contents detected.  
 CELLZ01\_ALERT\_1\_G WARNING: H atoms missing from atom site list. Is this intentional?  
 From the CIF: \_cell\_formula\_units\_Z 2  
 From the CIF: \_chemical\_formula\_sum C38 H52 Cu N2 O6  
 TEST: Compare cell contents of formula and atom\_site data

| atom | Z*formula | cif sites | diff |
|------|-----------|-----------|------|
| C    | 76.00     | 76.00     | 0.00 |
| H    | 104.00    | 100.00    | 4.00 |
| Cu   | 2.00      | 2.00      | 0.00 |
| N    | 4.00      | 4.00      | 0.00 |
| O    | 12.00     | 12.00     | 0.00 |

|                   |                                                  |        |        |
|-------------------|--------------------------------------------------|--------|--------|
| PLAT002_ALERT_2_G | Number of Distance or Angle Restraints on AtSite | 3      | Note   |
| PLAT042_ALERT_1_G | Calc. and Reported MoietyFormula Strings Differ  | Please | Check  |
| PLAT172_ALERT_4_G | The CIF-Embedded .res File Contains DFIX Records | 2      | Report |
| PLAT180_ALERT_4_G | Check Cell Rounding: # of Values Ending with 0 = | 3      | Note   |
| PLAT793_ALERT_4_G | The Model has Chirality at C14 (Centro SPGR)     | S      | Verify |
| PLAT793_ALERT_4_G | The Model has Chirality at C27 (Centro SPGR)     | R      | Verify |
| PLAT794_ALERT_5_G | Tentative Bond Valency for Cu1 (II) .....        | 2.03   | Note   |
| PLAT860_ALERT_3_G | Number of Least-Squares Restraints .....         | 2      | Note   |
| PLAT933_ALERT_2_G | Number of OMIT records in Embedded RES .....     | 5      | Note   |

---

0 **ALERT level A** = Most likely a serious problem - resolve or explain  
 2 **ALERT level B** = A potentially serious problem, consider carefully  
 10 **ALERT level C** = Check. Ensure it is not caused by an omission or oversight  
 12 **ALERT level G** = General information/check it is not something unexpected

6 ALERT type 1 CIF construction/syntax error, inconsistent or missing data  
 11 ALERT type 2 Indicator that the structure model may be wrong or deficient  
 2 ALERT type 3 Indicator that the structure quality may be low  
 4 ALERT type 4 Improvement, methodology, query or suggestion  
 1 ALERT type 5 Informative message, check

---

It is advisable to attempt to resolve as many as possible of the alerts in all categories. Often the minor alerts point to easily fixed oversights, errors and omissions in your CIF or refinement strategy, so attention to these fine details can be worthwhile. In order to resolve some of the more serious problems it may be necessary to carry out additional measurements or structure refinements. However, the purpose of your study may justify the reported deviations and the more serious of these should normally be commented upon in the discussion or experimental section of a paper or in the "special\_details" fields of the CIF. checkCIF was carefully designed to identify outliers and unusual parameters, but every test has its limitations and alerts that are not important in a particular case may appear. Conversely, the absence of alerts does not guarantee there are no aspects of the results needing attention. It is up to the individual to critically assess their own results and, if necessary, seek expert advice.

### Publication of your CIF in IUCr journals

A basic structural check has been run on your CIF. These basic checks will be run on all CIFs submitted for publication in IUCr journals (*Acta Crystallographica*, *Journal of Applied Crystallography*, *Journal of Synchrotron Radiation*); however, if you intend to submit to *Acta Crystallographica Section C* or *E* or *IUCrData*, you should make sure that full publication checks are run on the final version of your CIF prior to submission.

### Publication of your CIF in other journals

Please refer to the *Notes for Authors* of the relevant journal for any special instructions relating to CIF

submission.

PLATON version of 11/08/2016; check.def file version of 04/08/2016

## Datablock Cuibufgamapic - ellipsoid plot

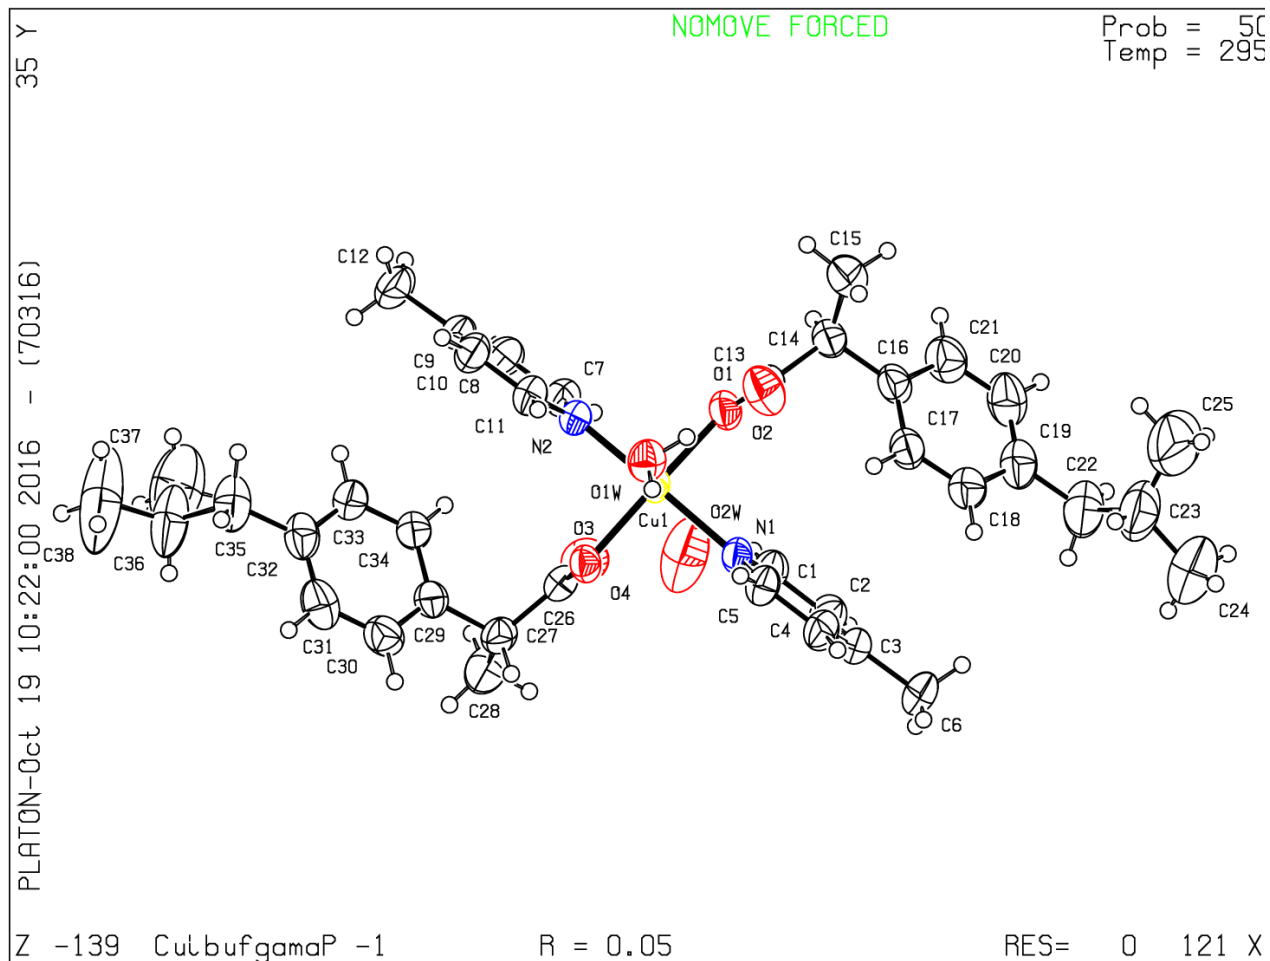

## Complex 3- checkcif

### Datablock: pyrrolidine

---

|                 |                                       |                    |
|-----------------|---------------------------------------|--------------------|
| Bond precision: | C-C = 0.0056 Å                        | Wavelength=0.71073 |
| Cell:           | a=16.5388(4) b=6.1918(1) c=17.4653(4) |                    |
|                 | alpha=90 beta=94.8030(14) gamma=90    |                    |
| Temperature:    | 295 K                                 |                    |

|                        | Calculated                | Reported                  |
|------------------------|---------------------------|---------------------------|
| Volume                 | 1782.25(7)                | 1782.25(7)                |
| Space group            | P 21/c                    | P 21/c                    |
| Hall group             | -P 2ybc                   | -P 2ybc                   |
| Moiety formula         | C34 H52 Cu N2 O4, 2(H2 O) | C34 H52 Cu N2 O4, 2(H2 O) |
| Sum formula            | C34 H56 Cu N2 O6          | C34 H56 Cu N2 O6          |
| Mr                     | 652.36                    | 652.34                    |
| Dx, g cm <sup>-3</sup> | 1.216                     | 1.216                     |
| Z                      | 2                         | 2                         |
| Mu (mm <sup>-1</sup> ) | 0.655                     | 0.655                     |
| F000                   | 702.0                     | 702.0                     |
| F000'                  | 702.90                    |                           |
| h, k, lmax             | 21, 8, 23                 | 21, 8, 23                 |
| Nref                   | 4303                      | 4282                      |
| Tmin, Tmax             | 0.855, 0.943              | 0.848, 0.945              |
| Tmin'                  | 0.735                     |                           |

Correction method= # Reported T Limits: Tmin=0.848  
Tmax=0.945 AbsCorr = MULTI-SCAN

Data completeness= 0.995 Theta(max)= 28.000

R(reflections)= 0.0548( 3371) wR2(reflections)= 0.1572( 4282)

S = 1.064 Npar= 235

---

The following ALERTS were generated. Each ALERT has the format

**test-name\_ALERT\_alert-type\_alert-level.**

Click on the hyperlinks for more details of the test.

---

#### Alert level B

PLAT230\_ALERT\_2\_B Hirshfeld Test Diff for C8 -- C9 .. 8.0 s.u.

---

#### Alert level C

PLAT213\_ALERT\_2\_C Atom C16A has ADP max/min Ratio .... 3.4 prolat  
PLAT222\_ALERT\_3\_C Non-Solvent Resd 1 H Uiso(max)/Uiso(min) Range 4.3 Ratio  
PLAT234\_ALERT\_4\_C Large Hirshfeld Difference C15 -- C17 .. 0.21 Ang.  
PLAT241\_ALERT\_2\_C High 'MainMol' Ueq as Compared to Neighbors of C3 Check  
PLAT242\_ALERT\_2\_C Low 'MainMol' Ueq as Compared to Neighbors of C5 Check

#### And 2 other PLAT242 Alerts

More ...

PLAT250\_ALERT\_2\_C Large U3/U1 Ratio for Average U(i,j) Tensor .... 2.6 Note  
PLAT334\_ALERT\_2\_C Small Average Benzene C-C Dist. C8 -C13 1.37 Ang.  
PLAT360\_ALERT\_2\_C Short C(sp3)-C(sp3) Bond C6 - C7 .. 1.38 Ang.

---

#### Alert level G

PLAT002\_ALERT\_2\_G Number of Distance or Angle Restraints on AtSite 11 Note  
PLAT066\_ALERT\_1\_G Predicted and Reported Tmin&Tmax Range Identical ? Check  
PLAT172\_ALERT\_4\_G The CIF-Embedded .res File Contains DFIX Records 3 Report

|                                                                           |           |
|---------------------------------------------------------------------------|-----------|
| PLAT176_ALERT_4_G The CIF-Embedded .res File Contains SADI Records        | 2 Report  |
| PLAT300_ALERT_4_G Atom Site Occupancy of >C15 is Constrained at           | 0.6 Check |
| <b>And 23 other PLAT300 Alerts</b>                                        |           |
| More ...                                                                  |           |
| PLAT301_ALERT_3_G Main Residue Disorder ..... Percentage =                | 15 Note   |
| PLAT790_ALERT_4_G Centre of Gravity not Within Unit Cell: Resd. #<br>H2 O | 2 Note    |
| PLAT793_ALERT_4_G The Model has Chirality at C6 (Centro SPGR)             | S Verify  |
| PLAT860_ALERT_3_G Number of Least-Squares Restraints .....                | 5 Note    |
| PLAT933_ALERT_2_G Number of OMIT records in Embedded RES .....            | 4 Note    |

---

0 **ALERT level A** = Most likely a serious problem - resolve or explain

1 **ALERT level B** = A potentially serious problem, consider carefully

10 **ALERT level C** = Check. Ensure it is not caused by an omission or oversight

33 **ALERT level G** = General information/check it is not something unexpected

1 ALERT type 1 CIF construction/syntax error, inconsistent or missing data

11 ALERT type 2 Indicator that the structure model may be wrong or deficient

3 ALERT type 3 Indicator that the structure quality may be low

29 ALERT type 4 Improvement, methodology, query or suggestion

0 ALERT type 5 Informative message, check

---

It is advisable to attempt to resolve as many as possible of the alerts in all categories. Often the minor alerts point to easily fixed oversights, errors and omissions in your CIF or refinement strategy, so attention to these fine details can be worthwhile. In order to resolve some of the more serious problems it may be necessary to carry out additional measurements or structure refinements. However, the purpose of your study may justify the reported deviations and the more serious of these should normally be commented upon in the discussion or experimental section of a paper or in the "special\_details" fields of the CIF. checkCIF was carefully designed to identify outliers and unusual parameters, but every test has its limitations and alerts that are not important in a particular case may appear. Conversely, the absence of alerts does not guarantee there are no aspects of the results needing attention. It is up to the individual to critically assess their own results and, if necessary, seek expert advice.

### Publication of your CIF in IUCr journals

A basic structural check has been run on your CIF. These basic checks will be run on all CIFs submitted for publication in IUCr journals (*Acta Crystallographica*, *Journal of Applied Crystallography*, *Journal of Synchrotron Radiation*); however, if you intend to submit to *Acta Crystallographica Section C* or *E* or *IUCrData*, you should make sure that full publication checks are run on the final version of your CIF prior to submission.

### Publication of your CIF in other journals

Please refer to the *Notes for Authors* of the relevant journal for any special instructions relating to CIF submission.

## Datablock pyrrolidine - ellipsoid plot

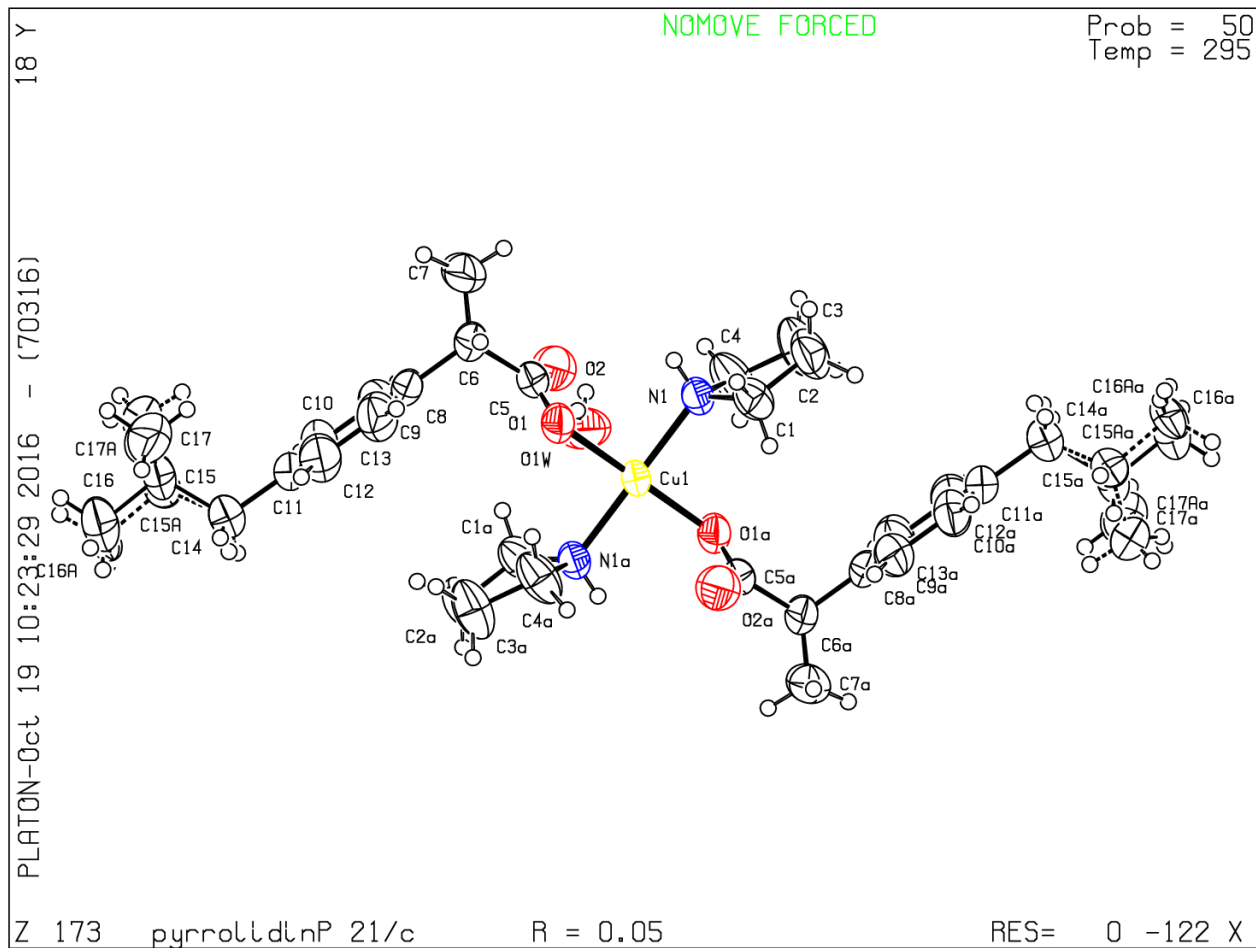

## Complex 4- checkcif

### Datablock: ibu7

---

|                 |                                              |                    |
|-----------------|----------------------------------------------|--------------------|
| Bond precision: | C-C = 0.0081 Å                               | Wavelength=0.71073 |
| Cell:           | a=9.6804 (8)    b=6.7371 (4)    c=29.453 (3) |                    |
|                 | alpha=90    beta=92.188 (3)    gamma=90      |                    |
| Temperature:    | 295 K                                        |                    |

  

|                        | Calculated                    | Reported                      |
|------------------------|-------------------------------|-------------------------------|
| Volume                 | 1919.5 (3)                    | 1919.5 (3)                    |
| Space group            | P 2/c                         | P 2/c                         |
| Hall group             | -P 2yc                        | -P 2yc                        |
| Moiety formula         | 2(C13 H17 O2), C8 H26 Cu N4 O | 2(C13 H17 O2), C8 H26 Cu N4 O |
| Sum formula            | C34 H60 Cu N4 O5              | C34 H60 Cu N4 O5              |
| Mr                     | 668.41                        | 668.40                        |
| Dx, g cm <sup>-3</sup> | 1.156                         | 1.156                         |
| Z                      | 2                             | 2                             |
| Mu (mm <sup>-1</sup> ) | 0.609                         | 0.609                         |
| F000                   | 722.0                         | 722.0                         |
| F000'                  | 722.89                        |                               |
| h, k, lmax             | 11, 8, 34                     | 11, 8, 34                     |
| Nref                   | 3372                          | 2773                          |
| Tmin, Tmax             | 0.903, 0.941                  | 0.621, 0.947                  |
| Tmin'                  | 0.808                         |                               |

Correction method= # Reported T Limits: Tmin=0.621  
Tmax=0.947 AbsCorr = MULTI-SCAN

Data completeness= 0.822    Theta(max)= 24.992

R(reflections)= 0.0640 ( 2162)    wR2(reflections)= 0.1489 ( 2773)

S = 1.058    Npar= 230

---

The following ALERTS were generated. Each ALERT has the format

**test-name\_ALERT\_alert-type\_alert-level.**

Click on the hyperlinks for more details of the test.

---

#### Alert level A

PLAT029\_ALERT\_3\_A \_diffn\_measured\_fraction\_theta\_full value Low .    0.822 Note

---

#### Alert level B

PLAT241\_ALERT\_2\_B High 'MainMol' Ueq as Compared to Neighbors of    C17 Check

---

#### Alert level C

PLAT220\_ALERT\_2\_C Non-Solvent Resd 1 C Ueq(max)/Ueq(min) Range    4.9 Ratio  
PLAT222\_ALERT\_3\_C Non-Solvent Resd 1 H Uiso(max)/Uiso(min) Range    6.1 Ratio  
PLAT234\_ALERT\_4\_C Large Hirshfeld Difference C14 -- C15A ..    0.16 Ang.  
PLAT241\_ALERT\_2\_C High 'MainMol' Ueq as Compared to Neighbors of    C10 Check  
PLAT241\_ALERT\_2\_C High 'MainMol' Ueq as Compared to Neighbors of    C14 Check  
PLAT242\_ALERT\_2\_C Low 'MainMol' Ueq as Compared to Neighbors of    C5 Check

#### And 2 other PLAT242 Alerts

More ...

PLAT341\_ALERT\_3\_C Low Bond Precision on C-C Bonds .....    0.00809 Ang.  
PLAT711\_ALERT\_1\_C BOND Unknown or Inconsistent Label .....    O1  
CU1 O1  
PLAT712\_ALERT\_1\_C ANGLE Unknown or Inconsistent Label .....    O1



|                   |       |                                     |    |
|-------------------|-------|-------------------------------------|----|
| N1                | CU1   | O1                                  |    |
| PLAT712_ALERT_1_C | ANGLE | Unknown or Inconsistent Label ..... | O1 |
| N1                | CU1   | O1                                  |    |
| PLAT712_ALERT_1_C | ANGLE | Unknown or Inconsistent Label ..... | O1 |
| N2                | CU1   | O1                                  |    |
| PLAT712_ALERT_1_C | ANGLE | Unknown or Inconsistent Label ..... | O1 |
| N2                | CU1   | O1                                  |    |

## Alert level G

|                   |                                                  |     |        |
|-------------------|--------------------------------------------------|-----|--------|
| PLAT002_ALERT_2_G | Number of Distance or Angle Restraints on AtSite | 6   | Note   |
| PLAT003_ALERT_2_G | Number of Uiso or Uij Restrained non-H Atoms ... | 4   | Report |
| PLAT176_ALERT_4_G | The CIF-Embedded .res File Contains SADI Records | 3   | Report |
| PLAT186_ALERT_4_G | The CIF-Embedded .res File Contains ISOR Records | 1   | Report |
| PLAT300_ALERT_4_G | Atom Site Occupancy of >C15A is Constrained at   | 0.6 | Check  |

### And 15 other PLAT300 Alerts

More ...

|                   |                                              |              |      |        |
|-------------------|----------------------------------------------|--------------|------|--------|
| PLAT301_ALERT_3_G | Main Residue Disorder .....                  | Percentage = | 7    | Note   |
| PLAT773_ALERT_2_G | Check long C-C Bond in CIF: C15 -- C16 .     |              | 1.72 | Ang.   |
| PLAT793_ALERT_4_G | The Model has Chirality at C6 (Centro SPGR)  |              | S    | Verify |
| PLAT794_ALERT_5_G | Tentative Bond Valency for Cu1 (II) .....    |              | 2.12 | Note   |
| PLAT860_ALERT_3_G | Number of Least-Squares Restraints .....     |              | 27   | Note   |
| PLAT933_ALERT_2_G | Number of OMIT records in Embedded RES ..... |              | 3    | Note   |

1 **ALERT level A** = Most likely a serious problem - resolve or explain

1 **ALERT level B** = A potentially serious problem, consider carefully

14 **ALERT level C** = Check. Ensure it is not caused by an omission or oversight

26 **ALERT level G** = General information/check it is not something unexpected

5 ALERT type 1 CIF construction/syntax error, inconsistent or missing data

11 ALERT type 2 Indicator that the structure model may be wrong or deficient

5 ALERT type 3 Indicator that the structure quality may be low

20 ALERT type 4 Improvement, methodology, query or suggestion

1 ALERT type 5 Informative message, check

It is advisable to attempt to resolve as many as possible of the alerts in all categories. Often the minor alerts point to easily fixed oversights, errors and omissions in your CIF or refinement strategy, so attention to these fine details can be worthwhile. In order to resolve some of the more serious problems it may be necessary to carry out additional measurements or structure refinements. However, the purpose of your study may justify the reported deviations and the more serious of these should normally be commented upon in the discussion or experimental section of a paper or in the "special\_details" fields of the CIF. checkCIF was carefully designed to identify outliers and unusual parameters, but every test has its limitations and alerts that are not important in a particular case may appear. Conversely, the absence of alerts does not guarantee there are no aspects of the results needing attention. It is up to the individual to critically assess their own results and, if necessary, seek expert advice.

## Publication of your CIF in IUCr journals

A basic structural check has been run on your CIF. These basic checks will be run on all CIFs submitted for publication in IUCr journals (*Acta Crystallographica*, *Journal of Applied Crystallography*, *Journal of Synchrotron Radiation*); however, if you intend to submit to *Acta Crystallographica Section C* or *E* or *IUCrData*, you should make sure that full publication checks are run on the final version of your CIF prior to submission.

## Publication of your CIF in other journals

Please refer to the *Notes for Authors* of the relevant journal for any special instructions relating to CIF submission.

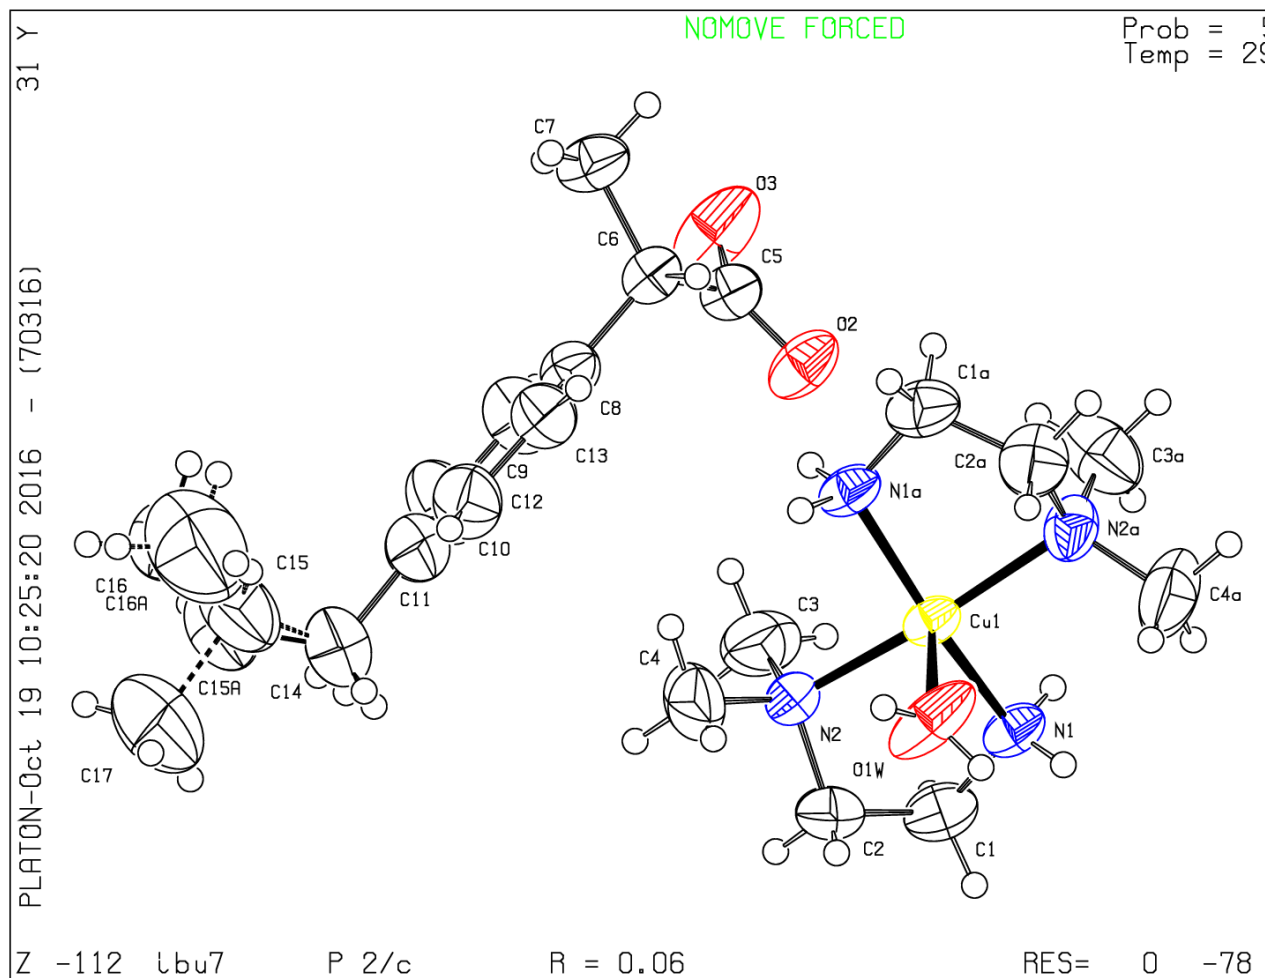

Supplement: c7nj00247e1.pdf [file c7nj00247e1.pdf]
